# Supplementary material for: Rapid real-time PCR and high resolution melt analysis in a self-filling thermoplastic chip
Source: Royal Society of Chemistry journal article supplement (doi:10.1039/c6lc00711b), 2016-01-01
Supplement: c6lc00711b1.pdf [file c6lc00711b1.pdf]

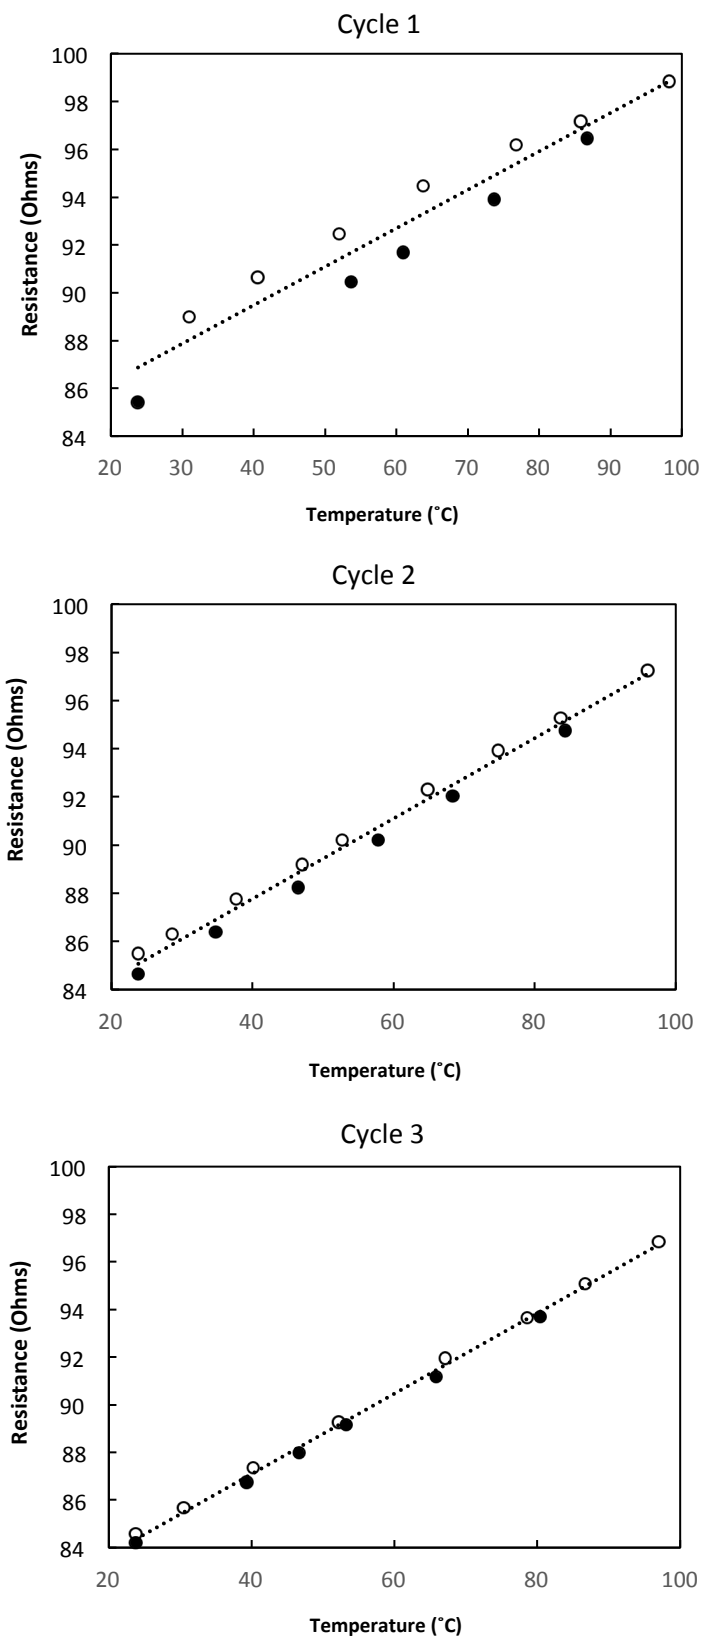

**SI Figure 1.** Measurements of thermistor resistance during temperature cycling between room temperature and 95 °C. plots over sequential 3 cycles. Heating (hollow dots) is followed by cooling (filled dots). All chips used in this work were burned in using a minimum of 3 temperature cycles to reduce hysteresis error to below 0.5% over the full PCR temperature range.
